# Supplementary material for: Voices of change: associations between vocal markers and symptoms of ADHD - Findings from the LIFE child study
Source: Eur Child Adolesc Psychiatry. 2026 Feb 26;35(6):1855–66. doi: 10.1007/s00787-025-02954-9 (PMC13337620; doi:10.1007/s00787-025-02954-9)
Supplement: Supplementary file 1 — Supplementary Material 1 (XLSX 19.1 KB) [file 787_2025_2954_MOESM1_ESM.xlsx]

## Sheet: Online Resource S1.1 LMM Robust
SDQ	Voice variable	n	df_resid	coef	se	ci_lower	ci_upper	p	q
HI	f0_conversation_I	1992	1986	0.043	0.018	0.008	0.077	0.017	0.033
	f0_conversation_II	1992	1986	0.069	0.02	0.03	0.109	0.001	0.001
	f0_presentation_III	1991	1985	0.05	0.021	0.008	0.092	0.019	0.038
	f0_quiet_V	1952	1946	0.064	0.019	0.027	0.101	0.001	0.002
	spl_ quiet_I	1992	1986	0.065	0.018	0.029	0.1	0	0.001
	spl_ conversation_II	1992	1986	0.051	0.018	0.015	0.087	0.005	0.01
	spl_ presentation_III	1991	1985	0.045	0.018	0.011	0.079	0.01	0.02
	spl_ quiet_V	1952	1946	0.079	0.019	0.043	0.116	0	0

## Sheet: Online Resource S1.2 LMM Sex 
SDQ	Voice variable	n	df_resid	coef	se	ci_lower	ci_upper	p	q
HI	f0_conversation_II	1254	1249	0.088	0.028	0.033	0.144	0.002	0.005
	f0_quiet_V	1231	1226	0.076	0.025	0.026	0.125	0.003	0.006
	spl_quiet_I	1254	1249	0.083	0.022	0.04	0.127	0	0
	spl_conversation_II	1254	1249	0.064	0.023	0.019	0.108	0.005	0.011
	spl_loud_IV	1250	1245	0.058	0.022	0.015	0.102	0.008	0.019
	spl_quiet_V	1231	1226	0.084	0.023	0.039	0.128	0	0.001
SDQ	Voice variable	n	df_resid	coef	se	ci_lower	ci_upper	p	q
HI	f0_quiet_I	1164	1159	0.049	0.022	0.006	0.093	0.025	0.047
	f0_ quiet_V	1139	1134	0.073	0.023	0.028	0.118	0.001	0.003
	spl_ quiet_V	1139	1134	0.099	0.024	0.052	0.146	0	0
